# Supplementary material
Source: PubMed Central journal article supplement (PMC5653216)
Supplement: NIHMS912246-supplement-Supplemental.pdf [file NIHMS912246-supplement-Supplemental.pdf]

## Supporting Information

### **Nanoparticle – macrophage interactions: balance between clearance and cellular targeting**

Rahul Rattan,<sup>a,c</sup> Somnath Bhattacharjee,<sup>c</sup> Hong Zong,<sup>c</sup> Corban Swain,<sup>a, c</sup> Muneeb A. Siddiqui,<sup>a, c</sup> Scott H. Visovatti,<sup>a</sup> Yogendra Kanthi,<sup>a, b</sup> Sajani Desai,<sup>a,c</sup> David J. Pinsky,<sup>a</sup> and Sascha N. Goonewardena<sup>a,b,c,\*</sup>

\*Corresponding author: [sngoonew@med.umich.edu](mailto:sngoonew@med.umich.edu)

<sup>a</sup>Division of Cardiovascular Medicine, Internal Medicine, University of Michigan, Ann Arbor, MI

<sup>b</sup>Ann Arbor Veterans Affairs Health System, Ann Arbor, MI

<sup>c</sup>Michigan Nanotechnology Institute for Medicine and Biological Sciences, and Department of Internal Medicine, University of Michigan, Ann Arbor, Michigan 48109, United States

Address: University of Michigan Frankel Cardiovascular Center, 1500 East Medical Center Drive, SPC 5853, Ann Arbor, MI 48109-5853

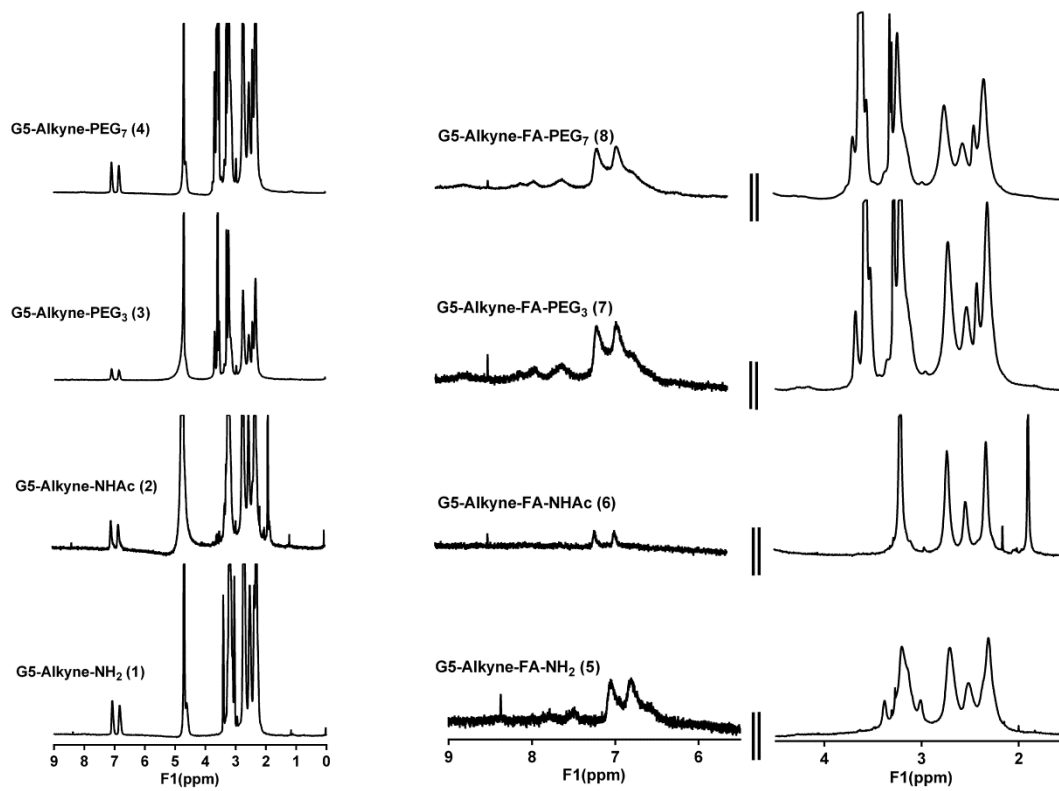

**Figure S1:**  $^1\text{H}$  NMR of non-targeted (without FA) and targeted (FA) conjugates

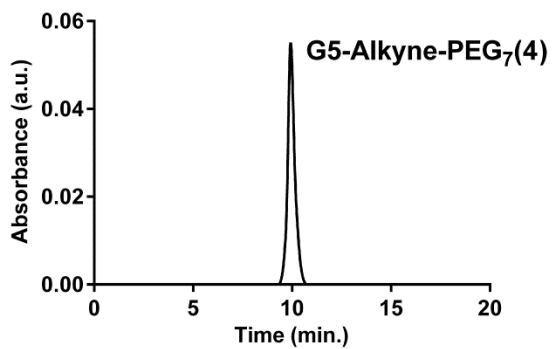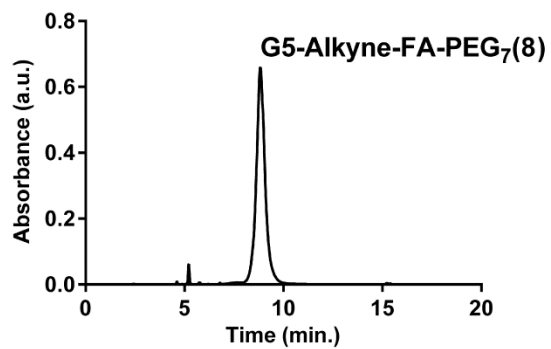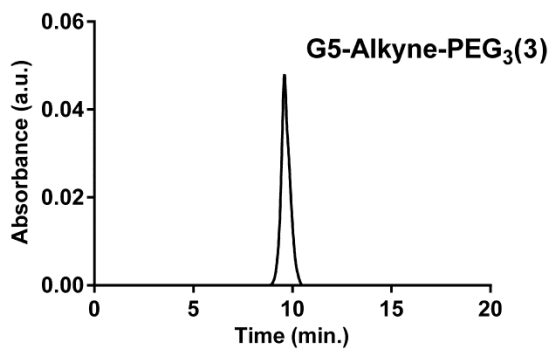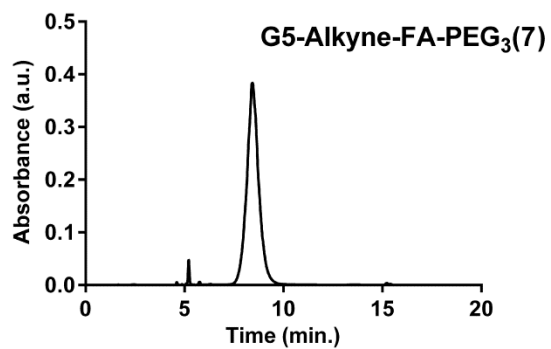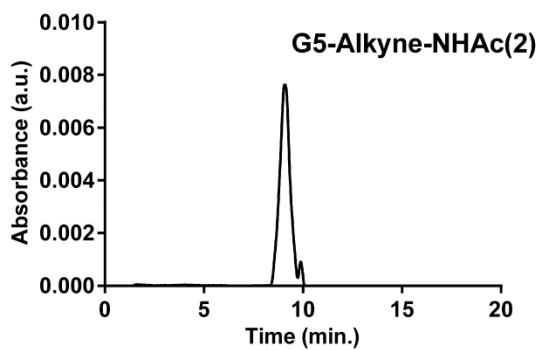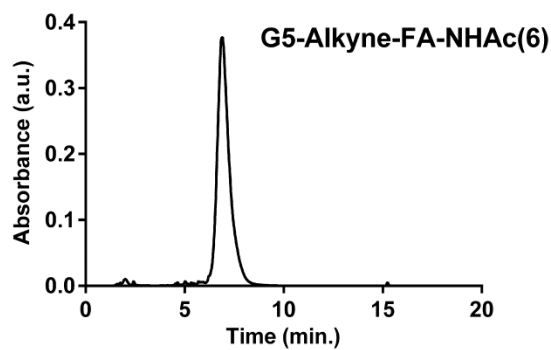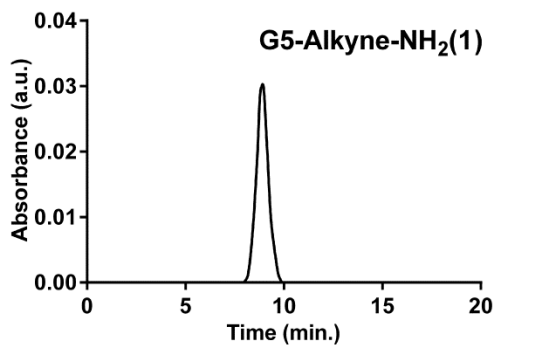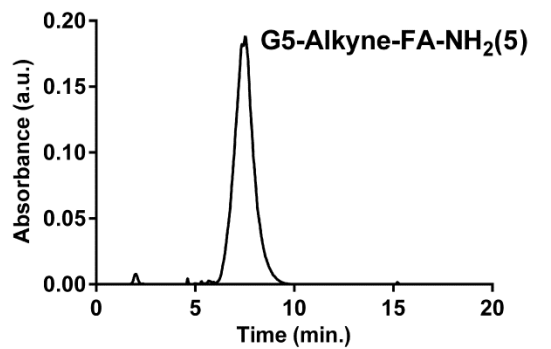

**Figure S2: UPLC chromatogram** of G5-Alkyne-NH<sub>2</sub> (1), G5-Alkyne-NHAc (2), G5-Alkyne-PEG<sub>3</sub> (3), G5-Alkyne-PEG<sub>7</sub> (4), G5-Alkyne-FA-NH<sub>2</sub> (5), G5-Alkyne-FA-NHAc (6), G5-Alkyne-FA-PEG<sub>3</sub> (7) and G5-Alkyne-FA-PEG<sub>7</sub> (8).

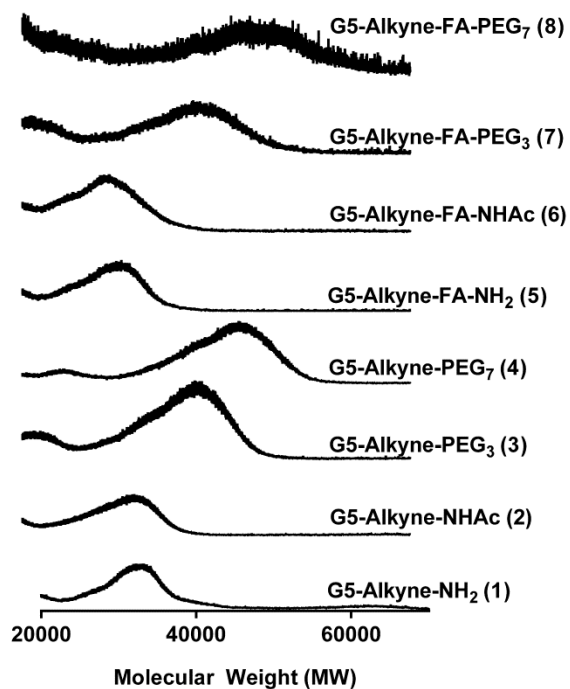

**Figure S3: MALDI-mass** of non-targeted (without FA) and targeted (FA) conjugates.

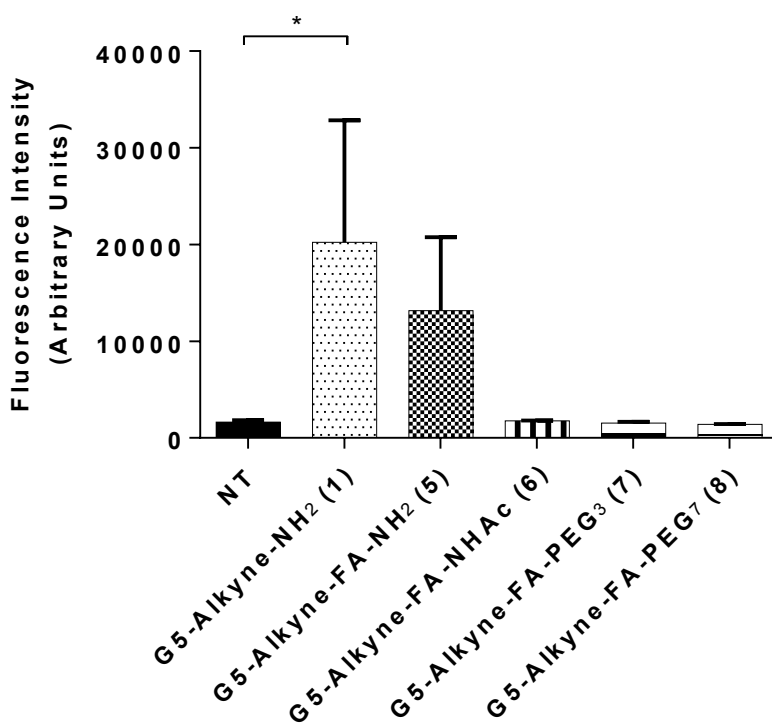

**Figure S4: Flow cytometry of modified targeted dendrimer conjugates clearance in RES cells.** RAW264.7 cells were incubated with 10 nM of the targeted dendrimer conjugates for 2 h. After incubation, the cells were harvested and AF647 was conjugated in situ using the CuAAC approach. Dendrimer clearance (Fluorescence Intensity) was then measured using flow cytometry. \*P<0.05 for NT and treatments (One way Anova, Dunnett's post-hoc test). Results are representative of 3 independent experiments.

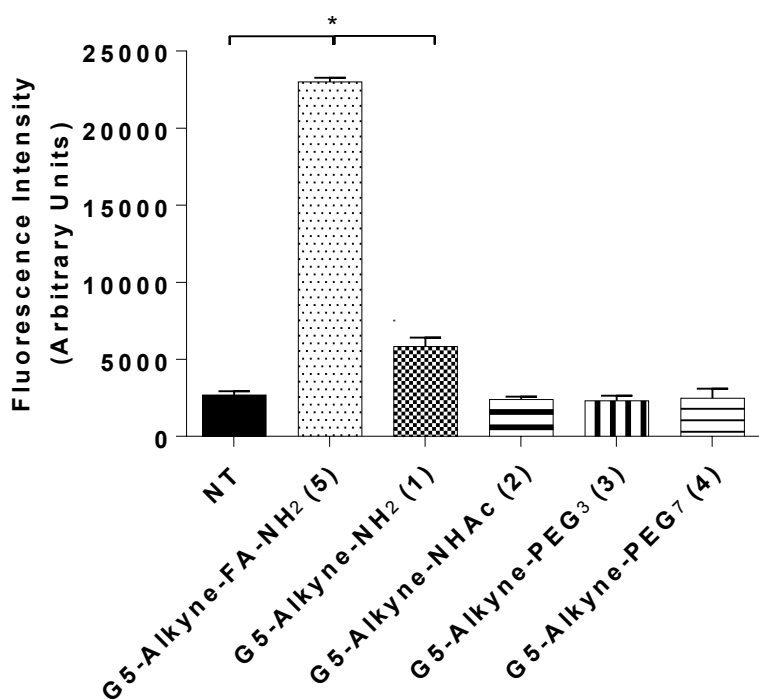

**Figure S5: Non-specific uptake of modified conjugates in KB cells.** KB cells were incubated with 10 nM of the non-targeted, surface-modified dendrimer conjugates for 2 h. After incubation, the cells were harvested and AF647 was conjugated in situ using the CuAAC approach. Dendrimer uptake was then measured using flow cytometry. \* $P < 0.05$  for NT and treatments (One way Anova, Dunnett's post-hoc test). Results are representative of 3 independent experiments.
